# Supplementary material for: Novel liquid chromatography-mass spectrometry for metabolite biomarkers of acute lung injury disease
Source: Royal Society of Chemistry journal article supplement (doi:10.1039/c6ay00968a), 2016-01-01
Supplement: c6ay00968a1.pdf [file c6ay00968a1.pdf]

**Table S1.** Demographic and baseline characteristics of the subjects enrolled in the study.

| <b>Parameter</b>                     | <b>Patients (n = 128)</b> | <b>Healthy volunteers (n = 121)</b> | <b>P value</b> |
|--------------------------------------|---------------------------|-------------------------------------|----------------|
| Age, years                           | 56±7                      | 55±8                                | 0.62           |
| Sex (male/female)                    | 105/103                   | 106/105                             | 0.54           |
| Days in the ICU                      | 6±1.2                     | -                                   | 0              |
| Body mass index (kg/m <sup>2</sup> ) | 25.72±4.30                | 26.54±5.07                          | 0.82           |
| APACHE II                            | 17.2±3.4                  | 7.64±1.25                           | 0.03           |
| SOFA-24h                             | 6.41±1.09                 | 2.79±0.46                           | 0.02           |
| Hemoglobin (g/dl)                    | 10.22±3.87                | 15.69±4.19                          | 0.10           |
| Leukocytes (x10 <sup>9</sup> /l)     | 13.91±2.70                | 18.80±3.08                          | 0.04           |
| Platelets (x10 <sup>9</sup> /l)      | 193.4±37.11               | 271.6±59.30                         | 0.01           |
| PCR (mg/l)                           | 168±26                    | 241±53                              | 0.02           |
| PCT (ng/ml)                          | 2.9±0.7                   | 1.5±0.2                             | 0.06           |
| Urea (mg/dl)                         | 75±18                     | 56±13                               | 0.09           |

Note: ICU intensive care unit, APACHE II Acute Physiology and Chronic Health Evaluation II, SOFA Sequential Organ Failure Assessment, PCT procalcitonin, PCR reactive C protein. \*p values, survivor vs non-survivor; ns, no significant value (p<0.05).
